# Supplementary material
Source: publisher figshare collection journal article supplement (https://future-science-group.figshare.com/ndownloader/files/28089642)
Supplement: Supplementary file 1 [file 28089642]

**Supplementary Table 1.** Antibacterial agents, their disc concentrations and standard diameters for clear zone of inhibition against bacteria to determine resistant, moderately resistant and sensitive profile in accordance with CLSI (Clinical and Laboratory Standards Institute) (CLSI, 2016)

| **Antimicrobial groups** | **Antimicrobial agents** | **Disc conc. (μg)** | **Zone interpretation (diameter in mm)** | | |
| --- | --- | --- | --- | --- | --- |
| **Sensitive** | **Moderately resistant** | **Resistant** |
| Aminoglycoside | Gentamycin (GEN) | **10** | **≥15** | **13-14** | **≤12** |
| Carbapenem | Imipenem(IMP) | **10** | **≥16** | **14-15** | **≤13** |
| Cephalosporin | Ceftriaxone (CTR) | **30** | **≥21** | **14-20** | **≤13** |
| Cefixime (CFM) | **5** | **≥19** | **16-18** | **≤15** |
| Cefuroxime (CXM) | **30** | **≥18** | **15-17** | **≤ 14** |
| Combination | Co-trimoxazole(COT) | **25** | **≥16** | **11–15** | **≤ 11** |
| Amoxyclav (AMC) | **30** | **≥18** | **14-17** | **≤13** |
| Cefixime-clavulanic acid (CMC) | **NA** | **NA** | **NA** | **NA** |
| Fluoroquinolone | Ciprofloxacin(CIP) | **5** | **≥21** | **16-20** | **≤ 15** |
| Macrolide | Azithromycin(AZM) | **30** | **≥18** | **14-17** | **≤ 13** |
| Penicillin | Amoxicillin(AMX) | **30** | **≥18** | **14-17** | **≤ 13** |

NA, not available in CLSI
